# Supplementary material for: Partial impairment of insulin receptor expression mimics fasting to prevent diet-induced fatty liver disease
Source: PubMed Central journal article supplement (PMC7190665; doi:10.1038/s41467-020-15623-z), 2020-04-29
Supplement: 41467_2020_15623_MOESM1_ESM.pdf [file 41467_2020_15623_MOESM1_ESM.pdf]

**Supplementary Table 1. Antibodies.**

| <b>Protein</b>                     | <b>Supplier</b> | <b>Catalog number</b> | <b>Dilution</b> |
|------------------------------------|-----------------|-----------------------|-----------------|
| $\alpha$ -tubulin                  | Sigma-Aldrich   | T6074                 | 1:10,000        |
| $\beta$ -actin                     | Sigma-Aldrich   | A2228                 | 1:10,000        |
| AKT phosphor-Ser473                | CST             | 9271                  | 1:1000          |
| AKT                                | CST             | 9279                  | 1:1000          |
| AMPK phospho-Thr172                | CST             | 2531                  | 1:1000          |
| AMPK $\alpha$                      | CST             | 2532                  | 1:1000          |
| FOXO1 phosphor-S256                | CST             | 9461                  | 1:1000          |
| FOXO1                              | CST             | 9462                  | 1:1000          |
| GSK3 $\alpha/\beta$ phosphor-S21/9 | CST             | 9331                  | 1:1000          |
| GSK3 $\beta$                       | CST             | 9315                  | 1:1000          |
| IR $\beta$                         | CST             | 3020                  | 1:1000          |
| PGC1 $\alpha$                      | Millipore       | 2213                  | 1:500           |
| P70S6K phosphor-T421/S424          | CST             | 9204                  | 1:1000          |
| P70S6K                             | CST             | 2708                  | 1:1000          |
| PGC1 $\alpha$                      | Millipore       | 2213                  | 1:500           |
| RPS6 phosphor-S235/236             | Abcam           | ab12864               | 1:1000          |
| RPS6                               | Abcam           | ab40820               | 1:1000          |

CST= Cell signalling technologies

**Supplementary Table 2.** Mouse qPCR primer sequences.

| <b>Gene name</b> | <b>Forward primer</b>     | <b>Reverse primer</b>      |
|------------------|---------------------------|----------------------------|
| <i>18s</i>       | GATCCATTGGAGGGCAAGTCT     | CCAAGATCCAACACTACGAGCTTTTT |
| <i>Aca1l</i>     | CTTGCGATCAGCTCTTTCA       | GGTACATGTGGGAGTACCCG       |
| <i>Aca1vl</i>    | GTGGCTCTGCAAGGCTGTA       | CGATTCCTGTCCCTCCGTCTC      |
| <i>Acs15</i>     | ACCCTTTTGATGACGACCTG      | CTCCTTTGGGGTCACCTGTA       |
| <i>Acaa2</i>     | AACGAGGCTGGCTACTTCAA      | CAGGGGCGTGAAGTTATGTT       |
| <i>Aox</i>       | TGAAGCCTGACGGCACGTATGTAA  | TTGGACAGACTCTGAGCTGCACTT   |
| <i>Atgl</i>      | AACACCAGCATCCAGTTCAA      | GGTTCAGTAGGCCATTCTC        |
| <i>Cd36</i>      | GCCAAGCTATTGCGACATGA      | ATCTCAATGTCCGAGACTTTTTCAAC |
| <i>Chrebp</i>    | CTGGGGACCTAAACAGGAGC      | GAAGCCACCCTATAGCTCCC       |
| <i>Cpt1</i>      | GAACCCCAACATCCCCAAAC      | TCCTGGCATTCTCCTGGAAT       |
| <i>Fasn</i>      | TTCCAAGACGAAAATGATGC      | AATTGTGGGATCAGGAGAGC       |
| <i>G6p</i>       | TGCAAGGGAGAACTCAGCAA      | GGACCAAGGAAGCCACATG        |
| <i>Gk</i>        | CCCTGAGTGGCTTACAGTTC      | ACGGATGTGAGTGTGAAGC        |
| <i>Glut2</i>     | GTCCAGAAAGCCCCAGATACC     | GTGACATCCTCAGTTCCTCTTAG    |
| <i>Pepck</i>     | GTGTTTGTAGGAGCAGCCATGAGA  | GCCAGTGGGCCAGGTATTTG       |
| <i>Pfkl</i>      | ACGAGGCCATCCAGCTCCGT      | TGGGGCTTGGGCAGTGTCCCT      |
| <i>Pppargc1a</i> | AAGTGTGGAACCTCTCTGGAACCTG | GGGTTATCTTGGTTGGCTTTATG    |
| <i>Ppara</i>     | ACAAGGCCTCAGGGTACCA       | GCCGAAAGAAGCCCTTACAG       |
| <i>Pparg</i>     | CAAGAATACCAAAGTGCGATCAA   | GAGCTGGGTCTTTTCAGAATAATA   |
| <i>Scd1</i>      | TGGGTTGGCTGCTTGTG         | GCGTGGGCAGGATGAAG          |
| <i>Srebp1c</i>   | AACGTCACCTCCAGCTAGAC      | CCACTAAGGTGCCTACAGAGC      |

## Supplementary figure 1

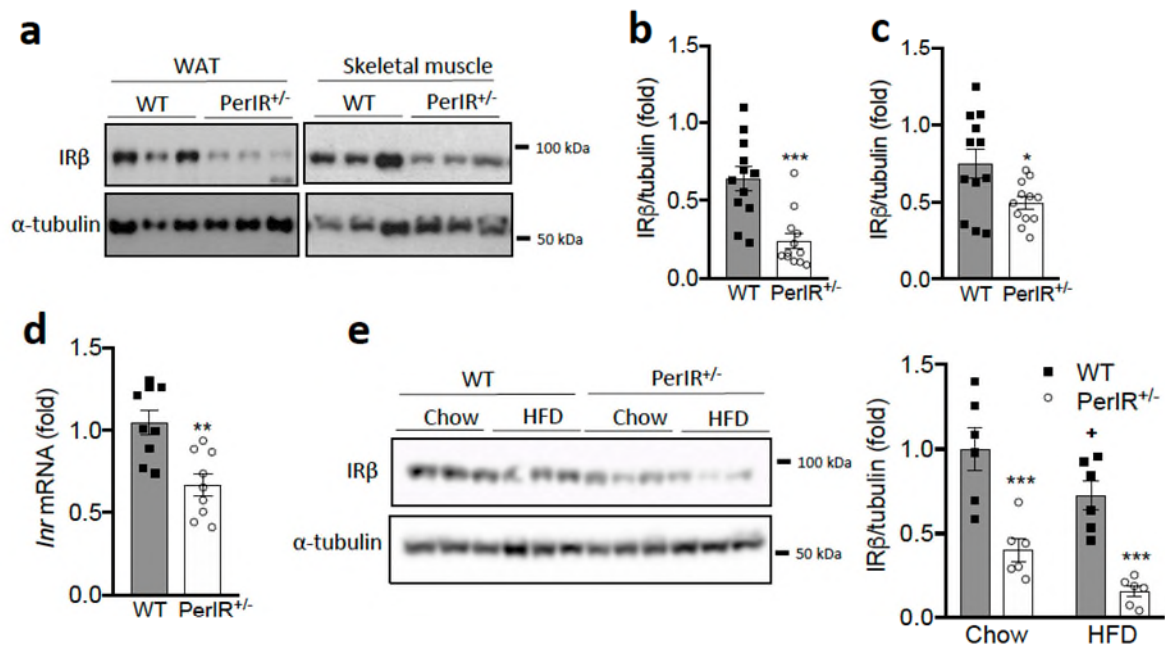

**Supplementary Figure 1. Insulin receptor (IR) expression in PerIRKO<sup>+/-</sup> mice fed a high fat diet.** Ten days following tamoxifen (TX) treatment, male mice were fed a high fat diet (HFD) for 10 weeks and white adipose tissue (WAT) and skeletal (sk.) muscle (*gastrocnemius*) insulin receptor (IR) β expression was determined (**a**). Quantification of IRβ expression protein expression in WAT (**b**), skeletal muscle (**c**) and hepatic mRNA (**d**) of HFD fed WT and PerIRKO<sup>+/-</sup> mice, and protein expression in the liver of chow and HFD WT and PerIRKO<sup>+/-</sup> mice (**e**). Results are shown as means ± SE, with n's represented as individual data point's in figures. Significance was determined using two tailed student's t-test; \*p < 0.05, \*\*p < 0.01 vs WT, and +p < 0.05 vs chow diet of the same genotype.

## Supplementary figure 2

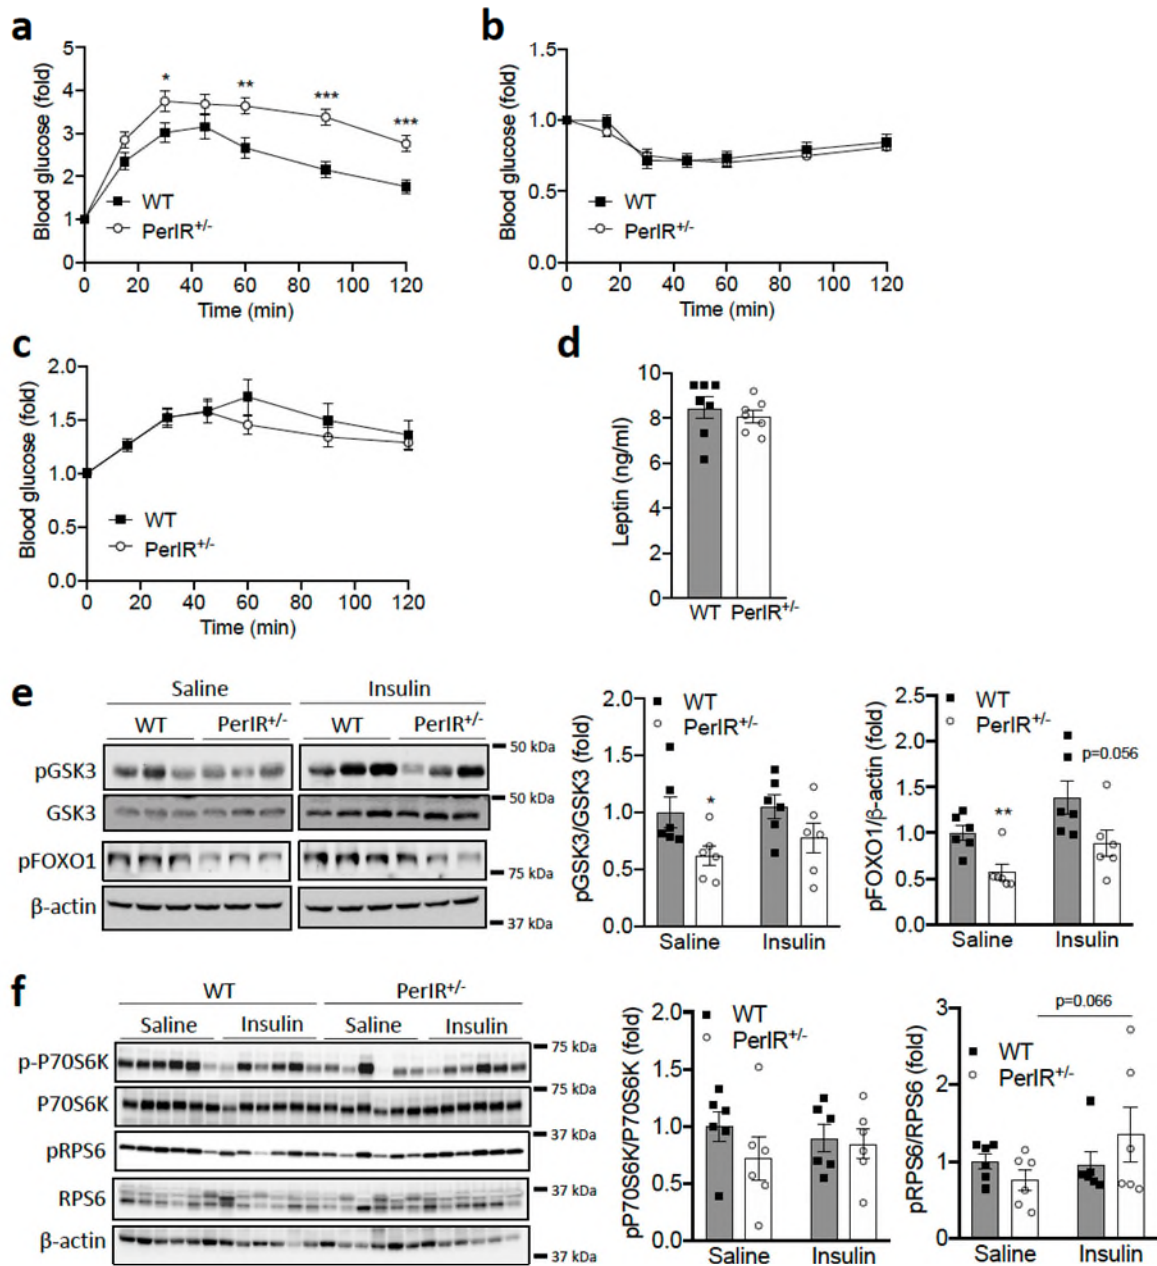

**Supplementary Figure 2. Normalized glucose tolerance and insulin sensitivity, and downstream insulin and lipogenesis signaling in the livers of PerIRKO<sup>+/-</sup> mice fed a high fat diet.** Ten days following tamoxifen (TX) treatment, male mice were fed a high fat diet (HFD) for 10 weeks and glucose homeostasis and insulin sensitivity was assessed via glucose (GTT) (a), insulin (ITT) (b) and pyruvate (PTT) (c) tolerance test (normalized data from figure 2 ). Plasma leptin levels (d) and hepatic phosphorylation of GSK3 and FOXO1 (e),

P70S6K and RPS6 (f) and in WT and PerIRKO<sup>+/-</sup> mice. Results are shown as means  $\pm$  SE, with n's represented as individual data point's in figures. For tolerance tests n=11-12 per genotype. Significance was determined using two tailed student's t-test or ANOVA. \*p < 0.05, \*\*p < 0.01, \*\*\*p < 0.001 vs WT of same condition or timepoint.

### Supplementary figure 3

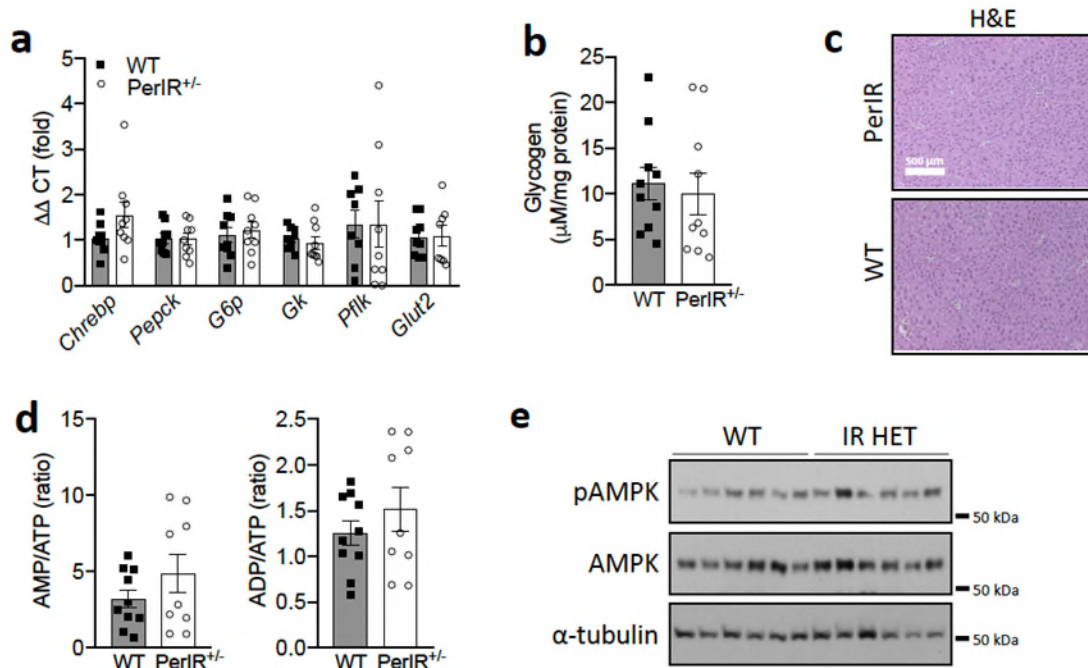

**Supplementary Figure 3. Partial peripheral tissue IR disruption does not affect hepatic regulation in chow fed mice.** Livers were collected from male WT and PerIRKO<sup>+/-</sup> mice 6 weeks following tamoxifen (TX) treatment, and glucogenogenic gene expression (**a**) and glycogen levels (**b**), H&E staining (**c**), AMP, ATP, ADP levels (**d**) and AMPK phosphorylation (**e**) was determined. Results are shown as means  $\pm$  SE, with n's represented as individual data point's in figures. For n=8-10 per group except for representative blots.
